# Supplementary material for: Deep Learning in Plant Phenological Research: A Systematic Literature Review
Source: Front Plant Sci. 2022 Mar 17;13:805738. doi: 10.3389/fpls.2022.805738 (PMC8969581; doi:10.3389/fpls.2022.805738)
Supplement: Supplementary file 1 [file Table_1.XLSX]

## Sheet: all infos
Study	sensor_type	dl_method	DL Task	classification task	Sensor	Data Augmentation	vegetation type	bioms	country	phenology expression	Species
Cai et al 2018	satellite imagery	DNN	segmentation	expansion of leaves or SOS	Landsat- 5,7, 8	n	cropland	temperate	us	expansion of leaves (SOS)
cao et al 2021	digital repeat photography	ResNet101	regression	expansion of leaves or SOS	PhenoCam	y	forest	temperate	us, canada	leave
		ResNet102
Correia et al.2020	digital repeat photography	RetinaNet	detection	breaking of leaf buds or initial growth	RGB	n	forest	boreal forest	canada	bud	Abies balsamea, Picea mariana
Davis et al. 2020	herbarium material	Mask R-CNN	segmentation	appearance of flowers	digital specimen	y	herbarium specimens	NA	us	fruit, flower, bud
				appearance of fruits
				breaking of leaf buds or initial growth
Ganesh et al 2019	digital repeat photography	Mask R-CNN	segmentation	appearance of fruits	RGB	n	commercial plantation	temperate	us	fruit	Orange
Goeau et al. 2020	herbarium material	Mask R-CNN	segmentation	appearance of flowers	digital specimen	y	herbarium specimens	NA	us	fruit, flower, bud	Streptanthus tortuosus
				appearance of fruits
				breaking of leaf buds or initial growth
Han et al.2021	digital repeat photography	AlexNet	classification	appearance of flowers	RGB	y	cropland	temperate	china	10 growth stages (germination to senescence) Germination, Leaf development, Tillering, Stem elongation, Booting, Heading, Flowering, Development of fruit, Ripening, Senescence	rice
				appearance of fruits
				breaking of leaf buds or initial growth
				expansion of leaves or SOS
				leaf abscission or EOS
				senescence
J. Kim et al.2021	satellite imagery	U-Net	segmentation	expansion of leaves or SOS	sential 2 10 m res.	y	forest	temperate	north korea	expansion of leaves (SOS)
Kim et al.2021	digital repeat photography	NasNet	classification	appearance of flowers	sential 2	y	forest	temperate	korea	flower	Cornus kousa, Prunus yedoensis, Magnolia denudata, Prunus yedoensis
Li et al 2020	satellite imagery	temporal group attention network	segmentation	expansion of leaves or SOS	sential 2, landsat-8	n	cropland	temperate	china	expansion of leaves (SOS), leaf abscission (EOS)
				leaf abscission or EOS
Lorieul et al.2019	herbarium material	ResNet50	classification	appearance of flowers	digital specimen	y	herbarium specimens	NA	france	bud, flower, fruit, sporangia, cones
				appearance of fruits
				breaking of leaf buds or initial growth
Milicevic at al.2020	digital repeat photography	cust.CNN	classification	appearance of flowers	RGB	y	commercial plantation	mediterranean	coratia	flower	Olea europaea
Nogueira et al.2019	digital repeat photography, UAV	cust.CNN	segmentation	expansion of leaves or SOS	RGB	n	savana, grassland, shrubland	tropical	brazil	expansion of leaves (SOS)	Aspidosperma tomentosum,Caryocar brasiliensis, Myrcia guianesis, Miconia rubiginosa, Pouteria ramiflora, Pouteria torta,Vochysia cinnamomea, Eremanthus erythropappus, Bowdichia virgilioides, Set of evergreen species
Pahalawatta et al.2020	digital repeat photography	Mask R-CNN	segmentation	appearance of flowers	RGB	y	commercial plantation	temperate	new zealand	flower	grape
Pearse et al. 2021	UAV	ResNet50	classification	appearance of flowers	RGB	n	forest	temperate	new zealand	flower	Metrosideros excelsa, Austropuccinia psidii
Tian et al.2020	satellite imagery	SAE	segmentation	expansion of leaves or SOS	Landsat- 5, 8	n	mangrove	temperate	china	expansion of leaves (SOS), senescence
				senescence
Velumani et al 2020	digital repeat photography	ResNet50	classification	appearance of flowers	RGB	n	cropland	temperate	france	wheat spike	Triticum aestivum,Triticum durum
Wagner 2021	satellite imagery	VGG-16	classification	appearance of flowers	sential 2 10 m res.	y	forest	temperate	brazil	flower	Pleroma genus
Wang et al 2020	digital repeat photography	cust.FCN	segmentation	appearance of flowers	RGB	y	commercial plantation	temperate	australia	flower	Malus domestica
Wang et al.2021	digital repeat photography	VGG-16	classification	appearance of flowers	RGB	y	commercial plantation	temperate	australia	flower	Malus domestica
Xin et al 2020	satellite imagery	four layer NN	regression	expansion of leaves or SOS	MODIS	n	forest, grassland	temperate	china	expansion of leaves (SOS), leaf abscission (EOS)
				leaf abscission or EOS
Yalchin 2017	digital repeat photography	AlexNet	classification	breaking of leaf buds or initial growth	RGB	n	cropland	temperate, mediterranean	turkey	9 growth stages (plowing to cropping)	Wheat, Barley, Lentil, Cotton, Pepper, Corn
Yang et al 2019	UAV	cust.CNN	regression	appearance of flowers	RGB, Multispectral	y	cropland	tropical	china	6 growth stage (5 leaves unfolded, Maximum number of tillers, Full flowering, Watery ripe, Late milk, Fully ripe)	rice
				appearance of fruits
				breaking of leaf buds or initial growth
				expansion of leaves or SOS
				leaf abscission or EOS
Yang et al. 2020	UAV	cust.CNN	classification	appearance of flowers	RGB, Multispectral	y	cropland	tropical	china	8 growth stage + harverst time ( Germination, Leaf development, Tillering, Stem elongation, Inflorescence emergence and heading, Flowering and anthesis, Development of fruit, Ripening, Harvested)	rice
				appearance of fruits
				breaking of leaf buds or initial growth
				expansion of leaves or SOS
				leaf abscission or EOS

## Sheet: R version
study	sensor_type	model	dl_task	pheno_expression	sensor	Data Augmentation	vegtype
Ganesh et al 2019	digital repeat photography	Mask R-CNN	segmentation	appearance of fruits	RGB	n	commercial plantation
Milicevic at al.2020	digital repeat photography	cust.CNN	classification	appearance of flowers	RGB	y	commercial plantation
Pahalawatta et al.2020	digital repeat photography	Mask R-CNN	segmentation	appearance of flowers	RGB	y	commercial plantation
Wang et al 2020	digital repeat photography	cust.FCN	segmentation	appearance of flowers	RGB	n	commercial plantation
Wang et al.2021	digital repeat photography	VGG-16	classification	appearance of flowers	RGB	y	commercial plantation
Cai et al 2018	satellite imagery	DNN	segmentation	expansion of leaves or SOS	Landsat- 5,7, 8	n	cropland
Han et al.2021	digital repeat photography	AlexNet	classification	appearance of flowers	RGB	y	cropland
Han et al.2021	digital repeat photography	AlexNet	classification	appearance of fruits	RGB	y	cropland
Han et al.2021	digital repeat photography	AlexNet	classification	expansion of leaves or SOS	RGB	y	cropland
Han et al.2021	digital repeat photography	AlexNet	classification	breaking of leaf buds or initial growth	RGB	y	cropland
Han et al.2021	digital repeat photography	AlexNet	classification	leaf abscission or EOS	RGB	y	cropland
Han et al.2021	digital repeat photography	AlexNet	classification	senescence	RGB	y	cropland
Li et al 2020	satellite imagery	temporal group attention network	segmentation	expansion of leaves or SOS	sential 2	n	cropland
Li et al 2020	satellite imagery	temporal group attention network	segmentation	expansion of leaves or SOS	landsat-8	n	cropland
Li et al 2020	satellite imagery	temporal group attention network	segmentation	leaf abscission or EOS	landsat-8	n	cropland
Li et al 2020	satellite imagery	temporal group attention network	segmentation	leaf abscission or EOS	sential 2	n	cropland
Velumani et al 2020	digital repeat photography	ResNet50	classification	appearance of flowers	RGB	n	cropland
Yalchin 2017	digital repeat photography	AlexNet	classification	breaking of leaf buds or initial growth	RGB	n	cropland
Yang et al 2019	UAV	cust.CNN	regression	expansion of leaves or SOS	RGB	y	cropland
Yang et al 2019	UAV	cust.CNN	regression	breaking of leaf buds or initial growth	RGB	y	cropland
Yang et al 2019	UAV	cust.CNN	regression	leaf abscission or EOS	RGB	y	cropland
Yang et al 2019	UAV	cust.CNN	regression	appearance of flowers	RGB	y	cropland
Yang et al 2019	UAV	cust.CNN	regression	appearance of fruits	RGB	y	cropland
Yang et al 2019	UAV	cust.CNN	regression	expansion of leaves or SOS	multispectral	y	cropland
Yang et al 2019	UAV	cust.CNN	regression	breaking of leaf buds or initial growth	multispectral	y	cropland
Yang et al 2019	UAV	cust.CNN	regression	leaf abscission or EOS	multispectral	y	cropland
Yang et al 2019	UAV	cust.CNN	regression	appearance of flowers	multispectral	y	cropland
Yang et al 2019	UAV	cust.CNN	regression	appearance of fruits	multispectral	y	cropland
Yang et al. 2020	UAV	cust.CNN	classification	expansion of leaves or SOS	multispectral	y	cropland
Yang et al. 2020	UAV	cust.CNN	classification	leaf abscission or EOS	multispectral	y	cropland
Yang et al. 2020	UAV	cust.CNN	classification	breaking of leaf buds or initial growth	multispectral	y	cropland
Yang et al. 2020	UAV	cust.CNN	classification	appearance of flowers	multispectral	y	cropland
Yang et al. 2020	UAV	cust.CNN	classification	appearance of fruits	multispectral	y	cropland
Yang et al. 2020	UAV	cust.CNN	classification	expansion of leaves or SOS	RGB	y	cropland
Yang et al. 2020	UAV	cust.CNN	classification	leaf abscission or EOS	RGB	y	cropland
Yang et al. 2020	UAV	cust.CNN	classification	breaking of leaf buds or initial growth	RGB	y	cropland
Yang et al. 2020	UAV	cust.CNN	classification	appearance of flowers	RGB	y	cropland
Yang et al. 2020	UAV	cust.CNN	classification	appearance of fruits	RGB	y	cropland
cao et al 2021	digital repeat photography	ResNet101	regression	expansion of leaves or SOS	PhenoCam	y	forest
cao et al 2021	digital repeat photography	ResNet102	regression	expansion of leaves or SOS	PhenoCam	y	forest
Correia et al.2020	digital repeat photography	RetinaNet	detection	breaking of leaf buds or initial growth	RGB	n	forest
Correia et al.2020	digital repeat photography	RetinaNet	detection	breaking of leaf buds or initial growth	RGB	n	forest
J. Kim et al.2021	satellite imagery	U-Net	segmentation	expansion of leaves or SOS	sential 2 10 m res.	y	forest
Kim et al.2021	digital repeat photography	NasNet	classification	appearance of flowers	sential 2	y	forest
Pearse et al. 2021	UAV	ResNet50	classification	appearance of flowers	RGB	n	forest
Wagner 2021	satellite imagery	VGG-16	classification	appearance of flowers	sential 2 10 m res.	y	forest
Xin et al 2020	satellite imagery	four layer NN	regression	expansion of leaves or SOS	MODIS	n	forest
Xin et al 2020	satellite imagery	four layer NN	regression	expansion of leaves or SOS	MODIS	n	forest
Nogueira et al.2019	digital repeat photography	cust.CNN	segmentation	expansion of leaves or SOS	RGB	n	grassland
Nogueira et al.2019	UAV	cust.CNN	segmentation	expansion of leaves or SOS	RGB	n	grassland
Xin et al 2020	satellite imagery	four layer NN	regression	expansion of leaves or SOS	MODIS	n	grassland
Xin et al 2020	satellite imagery	four layer NN	regression	leaf abscission or EOS	MODIS	n	grassland
Davis et al. 2020	herbarium material	Mask R-CNN	segmentation	breaking of leaf buds or initial growth	digital specimen	y	herbarium specimens
Davis et al. 2020	herbarium material	Mask R-CNN	segmentation	appearance of fruits	digital specimen	y	herbarium specimens
Davis et al. 2020	herbarium material	Mask R-CNN	segmentation	appearance of flowers	digital specimen	y	herbarium specimens
Goeau et al. 2020	herbarium material	Mask R-CNN	segmentation	breaking of leaf buds or initial growth	digital specimen	y	herbarium specimens
Goeau et al. 2020	herbarium material	Mask R-CNN	segmentation	appearance of flowers	digital specimen	y	herbarium specimens
Goeau et al. 2020	herbarium material	Mask R-CNN	segmentation	appearance of fruits	digital specimen	y	herbarium specimens
Lorieul et al.2019	herbarium material	ResNet50	classification	appearance of flowers	digital specimen	n	herbarium specimens
Lorieul et al.2019	herbarium material	ResNet50	classification	appearance of fruits	digital specimen	n	herbarium specimens
Lorieul et al.2019	herbarium material	ResNet50	classification	breaking of leaf buds or initial growth	digital specimen	n	herbarium specimens
Tian et al.2020	satellite imagery	SAE	segmentation	expansion of leaves or SOS	Landsat- 5, 8	n	mangrove
Tian et al.2020	satellite imagery	SAE	segmentation	senescence	Landsat- 5, 8	n	mangrove
Nogueira et al.2019	digital repeat photography	cust.CNN	segmentation	expansion of leaves or SOS	RGB	n	shrubland
Nogueira et al.2019	digital repeat photography	cust.CNN	segmentation	expansion of leaves or SOS	RGB	n	shrubland

## Sheet: list of publications
Titel	Study	year	Type	Key topics	Sensor	Number of Images which used for analysis	timing between images	Image type	Accuracy	where	Organism	name of species	number of species	Main Method
Improvememt of multi-temporal vegetation modeling using hybrid deep neural networks of multispectral remote sensing images	Bakhti et al.	2019	Conference Paper	Vegetation Modeling, Remote sensing, DNN, Hybrid model	Public datasets of Sentinel-2A images	NA	NA	RGB	0.774	NA	landcover	NA	NA	hybrid neural networks model (SVM, CNN, LSTM,RNN, Cnn+LSTM)
Integrating herbarium specimen observations into global phenology data systems	Brenskelle et al.	2019	Journal Article	Herbarium Specimen, Phenology	image from open sources (NPN and Herbarium data)	NA	NA	herbarium spacimen	NA	north america	tree	Prunus serotina	1	Linear regression model
Traits and climate are associated with first flowering day in herbaceous species along elevational gradients	Bucher et al.	2018	Journal Article	First Flowering day
Deep learning for supervised classification of temporal data in ecology	Capinha et al.	2021	Journal Article	DL, Ecology	feature-based approaches i.e., the conversion of the time series data into a set of temporally aggregated predictors of the target classes.	NA	NA	NA	0.85	NA	Incest	Bactrocera oleae, Apis mellifera, Lonchaea aristella	3	LSTM, CNN, Timeseries, ResNet, InceptionTime
Leveraging Artificial Intelligence for Large-Scale Plant Phenology Studies From Noisy Time-Lapse Images	Correia et al.	2020	Journal Article	AI, Phenology	Time- lapse camera	21 172 for Black spruce and 26 435 for Balsam fir	every 30 min	RGB	82.53% for P. mariana. 52.12% for A. balsamea	Canada, Quebec	tree	Abies balsamea, Picea mariana	2	RF, CNN and density-based spatial clustering algorithm to cluster open bud detections across the time-series
Temperature controls phenology in continuously flowering <i>Protea</i> species of subtropical Africa	Daru et al.	2019	Journal Article	Phenology	Herbarium specimens	1727	NA	NA	NA	subtropical Africa	shrub	Protea (Proteaceae)	25	Phenology modeling
Satellite prediction of forest flowering phenology	Dixon et al.	2021	Journal Article	phenology, timeseries, UAV	Drone and Satellite image (PlanetScope)	6645	NA	RGB ortho- mosaic raster	NA	Australia	Tree	Corymbia calophylla	1	A RF regression model was developed to predict the proportion of flowering within a pixel on a given day.
Innovative pheno-network model in estimating crop phenological stages with satellite time series	Diao	2019	Journal Article	Phenology, Crop, Time series, Remote sensing	MCD43A4	NA	NA	NA	NA	US	crops	corn, soy	2	pheno-network model (time series of a pixel using complex networks)
Emerging frontiers in phenological research	Ellwood et al.	2019	Journal Article	phenology
Phenology models using herbarium specimens are only slightly improved by using finer‐scale stages of reproduction	Ellwood et al.	2019	Journal Article	Phenology, herbarium specimen
Time-Space Tradeoff in Deep Learning Models for Crop Classification on Satellite Multi-Spectral Image Time Series	Garnot et al.	2019	Conference Paper	DL, Crop, remote sensing, Time series	Sentinel-2 multi-spectral image se- quences in top-of-canopy (TOC)	199 464 tensors of size 24 × 10 × 32 × 32	NA	tensor	0.9	France	NA	NA	NA	Hybrid neural network, a Multi Layer Perceptron (MLP) with two hidden layers of dimension 128 and 64.
Mapping of Rice Varieties with Sentinel-2 Data via Deep CNN Learning in Spectral and Time Domains	Guo et al.	2018	Conference Paper	Crop, DL	A time series of mul- titemporal remote sensing images recorded by the Multispectral Instrument (MSI) on-board the Sentinel-2A satellite	15 Sentinel-2 images	NA	spectral image	0.9287	Australia	Rice	Oryza sativa	1	deep CNN learning
Real-time detection of rice phenology through convolutional neural network using handheld camera images	Han et al.	2021	Journal Article	Crop, Phenology, DL	Handheld Camera (SONY)	7320	NA	RGB	0.913	china	Rice	Oryza sativa	1	GCC Time series approche, DCNN
Tree Species Identification Based on the Fusion of Multiple Deep Learning Models Transfer Learning	Hu et al.	2018	Conference Paper	DL, Forest, Tree	ImageNet dataset (AlexNet, VeggNet-16, Inception-V3	1.2 milion	NA	RGB	0.9375	china	tree	NA	NA	convolutional neural network models (AlexNet, VggNet-16, and Inception-V3) in the task of tree species identification based on transfer learning with these three models
Determining Spatiotemporal Distribution of Macronutrients in a Cornfield Using Remote Sensing and a Deep Learning Model	Jaihuni et al.	2021	Journal Article	DL, remote sensing,
Deep Learning Applications on Multitemporal SAR (Sentinel-1) Image Classification Using Confined Labeled Data: The Case of Detecting Rice Paddy in South Korea	Jo et al.	2020	Journal Article	DL, Crop, remote sensing	Sentinel-1 satellite	NA	NA	time series images	0.97	south korea	rice	Oryza sativa	1	fully connected recurrent neural networks (FCRNNs)
Convolutional Neural Networks enable efficient, accurate and fine-grained segmentation of plant species and communities from high-resolution UAV imagery	Kattenborn et al.	2019	Journal Article	DL, remote sensing,
Utilizing machine learning for detecting flowering in mid-range digital repeat photography	Kim et al.	2021	Journal Article	ML, phenology	Time- lapse camera, ImageNet-1000 and google image	16005	every hours	RGB	0.98	Korea	tree	NA	NA	VGG-16, ResNet50, ResNet101, MobileNet,NASNet
Estimating crop yields with deep learning and remotely sensed data	Kuwata and Shibaski	2015	Conference Paper	crop, DL, Remote sensing	Satellite (MOD09A1)	900 sets	NA	NA	NA	US	Corn	NA	1	Convolutional Architecture for Fast Feature Embedding (Caffe)
Climate, urbanization, and species traits interactively drive flowering duration	Li et al.	2021	Journal Article	phenology
Deep Learning in Forest Structural Parameter Estimation Using Airborne LiDAR Data	Liu et al.	2021	Journal Article	DL, remote sensing,
Trail camera networks provide insights into satellite-derived phenology for ecological studies	Liu et al.	2021	Journal Article	phenology, remote sensing	trailcams , Harmonized Landsat and Sentinel-2, Moderate Resolution Imaging Spectroradiometer	NA	NA	NA	NA	US	tree	NA	NA	the Pearson correlation coefficient (r) between paired samples, the differ- ence in means between the two samples, and Student’s paired t-test to indicate those differences in sample means that are significant at p = 0.05.
Toward a large‐scale and deep phenological stage annotation of herbarium specimens: Case studies from temperate, tropical, and equatorial floras	Lorieul et al.	2019	Journal Article	Herbarium Specimen, Phenology, DL	Herbarium specimens (NEVP, FSU, CAY, PHENO)	163233	NA	RGB	0.963	France	Herbs	NA	7782	ResNet50( Large and Very large)
Deep Learning for Vegetation Image Segmentation in LAI Measurement	Ma et al.	2020	Conference Paper	DL, vegetation Image
IPHEN—a real-time network for phenological monitoring and modelling in Italy	Mariani et al.	2013	Journal Article	phenology, time series
Deep Learning Solutions for Tandem-X-Based Forest Classification	Mazza and Sica	2019	Conference Paper	DL, Forest, Tree, remote sensing	Multispectral & synthetic aperture radar (SAR)	18707 tiles	NA	Tiles	0.9107	US	NA	NA	NA	ResNet and DenseNet
Application of Deep Learning Architectures for Accurate Detection of Olive Tree Flowering Phenophase	Milicevic at al.	2020	Journal Article	DL, Tree, Phenology	stationary cameras (Sony 16 MP, C920 HD Pro webcam 15 MP)	1400	NA	RGB	0.972	Croatia	Tree	Olea europaea	1	CNNs, VGG19, InceptionResNetV2, Xception, ResNet50
Spatio-Temporal Vegetation Pixel Classification by Using Convolutional Networks	Nogueira et al.	2019	Journal Article	DL, remote sensing, phenology	UAV ,Itirapina Dataset, SERRA DO CIPO ́ DATASET.		hourly	RGB				Multi-Temporal ConvNet for pixel classification
Willow phenological modelling at different altitudes in central Italy	Orlandi et al.	2020	Journal Article	phenology, modeling
A CNN Approach to Simultaneously Count Plants and Detect Plantation-Rows from UAV Imagery	Osco et al.	2021	Journal Article	DL, remote sensing,
Detection and classification of opened and closed flowers in grape inflorescences using Mask R-CNN	Pahalawatta et al.	2020	Conference Paper	phenology, DL	inflorescence images	245	NA	RGB	0.843	New Zealand	shrub	grape	1	mask R-CNN
Patterns and biases in an Arctic herbarium specimen collection: Implications for phenological research	Panchen et al.	2019	Journal Article	Herbarium Specimen, Phenology
PhenoForecaster: A software package for the prediction of flowering phenology	Park et al.	2019	Journal Article	phenology, modeling	Herbarium specimens	NA	NA	NA	NA	NA	Plants	Angiosperm species	2320	Elastic net regression , phenological modeling
Deep Learning and Phenology Enhance Large-Scale Tree Species Classification in Aerial Imagery during a Biosecurity Response	Pearse et al.	2021	Journal Article	DL,phenology, UAV	10 cm resolution aerial imagery	4600	NA	RGB	0.974	New Zealand	Tree and pathogen	Metrosideros excelsa & Austropuccinia psidii	2	tree-based models (XGBoost) and aerial imagery and Deep learning model
Machine Learning Using Digitized Herbarium Specimens to Advance Phenological Research (Without case study)	Pearson et al.	2020	Journal Article	ML, herbarium specimens, Phenology	herbarium specimen images	NA	NA	NA	NA	NA	NA	NA	NA	storage, generating training data, machine learning, deployment, and testing and analysis; Mask R-CNN
Deep Learning Models Performance For NDVI Time Series Prediction: A Case Study On North West Tunisia	Rhif et al.	2020	Conference Paper	DL, time series, forest
Tracking seasonal rhythms of plants in diverse ecosystems with digital camera imagery	Richardson	2019	Journal Article	Phenology, vegetation color, time serise	Phenocam		one per day	RGB	NA	around the Glob	not specific	NA	NA	color analysis with NDVI index and Time series
Testing Hopkins’ Bioclimatic Law with PhenoCam data	Richardson et al.	2019	Journal Article	Phenology, vegetation color, time serise	Phenocam		one per day	RGB	NA	US and Canada	not specific	NA	NA	Phenometric, color analysis
Flowers, leaves or both? How to obtain suitable images for automated plant identification	Rzanny et al.	2019	Journal Article	DL, vegetation Image	Flora Incognita Capture app	9090	NA	RGB	between 77.4 to 88.2	Germany	Grass and Forb	NA	101	CNN, Inception-ResNet-v2
Acquiring and preprocessing leaf images for automated plant identification: understanding the tradeoff between effort and information gain	Rzanny et al.	2017	Journal Article	DL, vegetation Image
Image-based classification of plant genus and family for trained and untrained plant species	Seeland et al.	2019	Journal Article	DL, vegetation Image
Tracking vegetation phenology across diverse biomes using Version 2.0 of the PhenoCam Dataset	Seyednasrollah et al.	2019	Journal Article	Phenology	Phenocam			RBG
The Plant Phenology Ontology: A New Informatics Resource for Large-Scale Integration of Plant Phenology Data	Stucky et al.	2018	Journal Article	phenology,DL	Phenocam	NA	NA	RBG	NA	NA
Development of spectral-phenological features for deep learning to understand Spartina alterniflora invasion	Tian et al.	2020	Journal Article	phenology, DL	Landsat imagery (Landsat-5 TM and Landsat-8 OLI)	443,616 Landsat pixels	NA	Low-tide	0.9622	US	Grass	Spartina alterniflora	1	Ppf-CM method ,Pixel-based methods,
Plant Species Identification Using Computer Vision Techniques: A Systematic Literature Review	Wäldchen and Mäder	2018	Journal Article	ML, vegetation Image
Machine learning for image based species identification	Wäldchen and Mäder	2018	Journal Article	ML, vegetation Image
Flora Incognita – wie künstliche Intelligenz die Pflanzenbestimmung revolutioniert: Botanik	Wäldchen and Mäder	2019	Journal Article	DL, vegetation Image
Automated plant species identification—Trends and future directions	Wäldchen et al.	2018	Journal Article	DL, vegetation Image
DeepPhenology: Estimation of apple flower phenology distributions based on deep learning	Wang et al.	2021	Journal Article	phenology, DL	RGB camera and four 40-Watt LED lights	ca. 1100 for each class	approximately 1–2 images per second	RGB	NA	Australia	Tree	Apple flower	1	DeepPhenology and YOLOv5
Phenological Prediction Algorithm Based on Deep Learning	Wang et al.	2019	Conference Paper	phenology, modeling, DL	Tif image file representing the vegetation index	NA	NA	RGB	NA	NA	NA	NA	NA	LSTM, RNN, NDVI, VGG16
<i>CrowdCurio</i> : an online crowdsourcing platform to facilitate climate change studies using herbarium specimens	Willis et al.	2017	Journal Article	Phenology, herbarium specimen
Plant phenology recognition using deep learning: Deep-Pheno	Yalchin	2017	Conference Paper	phenology, DL	camera	400 per species	NA	RGB	between 68.97% to 87.14%	Turkey	crop	Wheat, Barley, Lentil, Cotton, Pepper, Corn	5	AlexNet, a pre-trained CNN architecture
A near real-time deep learning approach for detecting rice phenology based on UAV images	Yang et al.	2020	Journal Article	phenology, remote sensing, DL	UAV) imagery	3160	NA	RGB	0.839	China	crop	Oryza saliva L.	1	phenology detection. CNN incorporated spatial pyramid pooling,
All models of satellite-derived phenology are wrong, but some are useful: A case study from northern Australia	Younes et al.	2021	Journal Article	remote sensing, phenology	Satellite imagery (Landsat5,8 and Sential 2)	352 Landsat and 260 Sentinel 2 images	NA	NA	NA	Australia	Tree	NA	NA	GAMs (Generalized additive models)
Deep learning based multi-temporal crop classification	Zhong et al.	2019	Journal Article	DL,crop, vegetation image	Landsat	NA	NA	NA	0.8241	US	crops	NA	NA	Vegetation Index (EVI) time series, LSTM, one-dimensional convolutional (Conv1D) layers

## Sheet: R table
Study	Year	Architecture	Evaluation	Task	Sensor	CNN Architecture
Correia et al.	2020	CNN	classification	open/close bud detection	RGB
Han et al.	2021	CNN	classification	Phenology stage detection	RGB
Kim et al.	2021	CNN	classification	Blossom color detection	RGB
Lorieul et al.	2019	CNN	classification	Phenology stage detection	RGB
Milicevic at al.	2020	CNN	classification	open/close bud detection	RGB
Nogueira et al.	2019	CNN	classification	segmentation	RGB	MC-DCNN	a deep-learning-based method that learns features for each and every single channel (or band) and then, concatenates them to be used in the classifier layer,
						2-D CNN	deep learning approach that performs pixel-classification using a temporal-wise concatenation of image.
						MSC	a multi-scale classifier (MSC) responsible for performing a late-fusion classification of input images.
Pahalawatta et al.	2020	CNN	classification	open/close bud detection	RGB
Pearse et al.	2021	CNN	classification	object detection	RGB
Tian et al.	2020	SAE, SVM	classification	segmentation	multispectral
Wang et al.	2021	CNN, YOLOv5	classification	Phenology stage detection	RGB
Yalchin	2017	CNN	classification	Phenology stage detection	RGB
Yang et al.	2020	CNN	classification	Phenology stage detection	RGB
Wang et al.	2020
Ganesh et al.	2019
Yang et al.	2019
Cai et al.	2018
Li et al.	2020
Xin et al.	2020
J.Wang et al.	2020
Diao	2019
Velumani et al.	2020
